# Supplementary material for: Facile synthesis of TiN decorated graphene and its enhanced catalytic effects on dehydrogenation performance of magnesium hydride
Source: Royal Society of Chemistry journal article supplement (doi:10.1039/c4nr00474d), 2014-01-01
Supplement: c4nr00474d1.pdf [file c4nr00474d1.pdf]

Electronic Supplementary Information For

**Facile synthesis of TiN decorated graphene and its enhanced catalytic effects on dehydrogenation performances of magnesium hydride**

Ying Wang, Li Li, Cuihua An, Yijing Wang\*, Chengcheng Chen, Lifang Jiao, Huatang Yuan

*Institute of New Energy Material Chemistry, Collaborative Innovation Center of Chemical Science and Engineering (Tianjin), Key Laboratory of Advanced Energy Materials Chemistry (MOE), Tianjin Key Lab on Metal and Molecule-based Material Chemistry, Nankai University, Tianjin 300071*

Email address: wangyj@nankai.edu.cn

**Supplementary Figures**

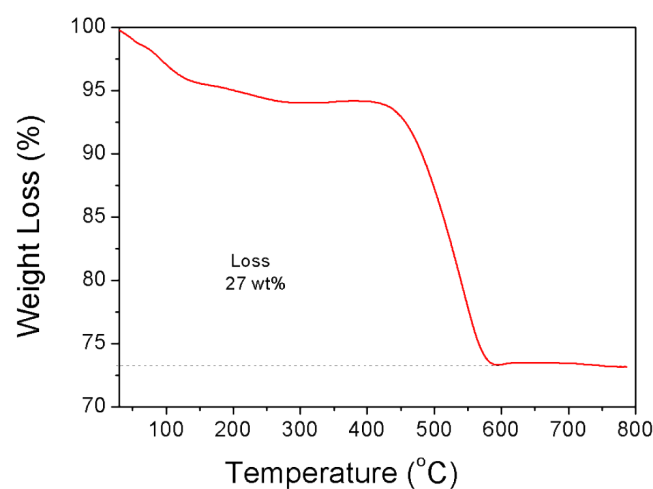

**Fig. S1** TG curve of TiN@rGO nanohybrids, measured in air atmosphere with a heating rate of 10 °C min<sup>-1</sup>.

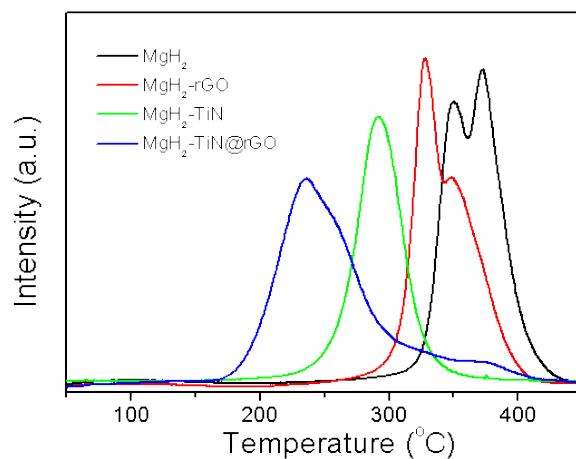

**Fig. S2** TPD curves of as-prepared pure  $\text{MgH}_2$ ,  $\text{MgH}_2\text{-rGO}$ ,  $\text{MgH}_2\text{-TiN}$  and  $\text{MgH}_2\text{-TiN@rGO}$  samples.

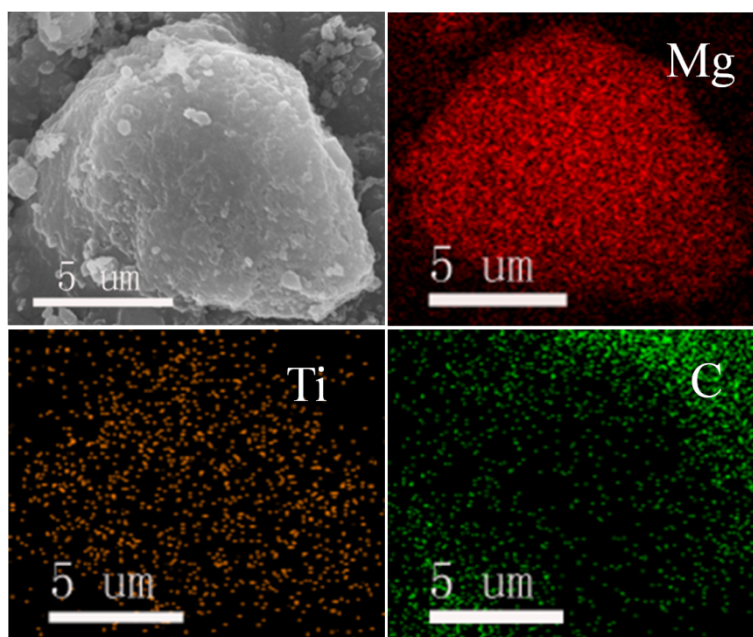

**Fig. S3** SEM and SEM-EDS elemental mapping images of the as-milled  $\text{MgH}_2\text{-TiN@rGO}$  composites.

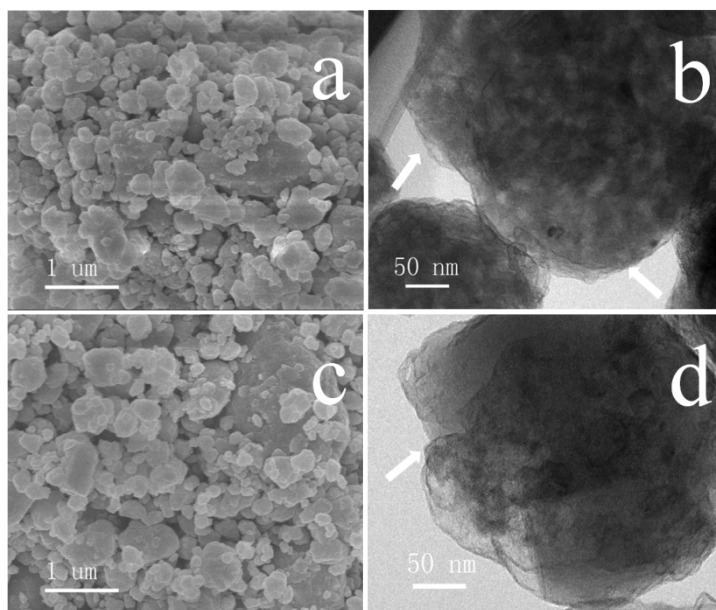

**Fig. S4** (a) SEM and (b) TEM images of the as-prepared  $\text{MgH}_2\text{-TiN@rGO}$  sample. (c) And (d) show the SEM and TEM images of the dehydrogenated  $\text{MgH}_2\text{-Ti@rGO}$  composites. Arrows in the images point to the  $\text{TiN@rGO}$  nanosheets.

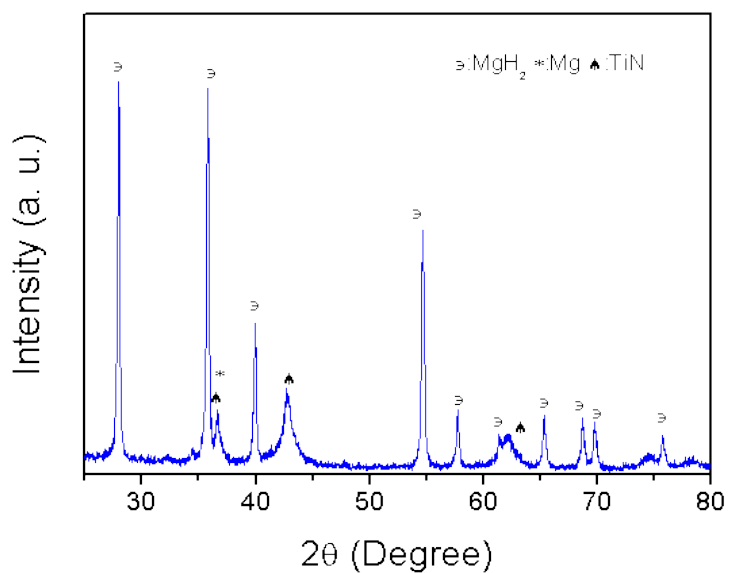

**Fig. S5** XRD curve of the re-hydrogenated  $\text{MgH}_2\text{-TiN@rGO}$  sample during the de/re-hydrogenation cycles.
